# Supplementary material for: Intensified future heat extremes linked with increasing ecosystem water limitation
Source: Copernicus journal article supplement (doi:10.5194/egusphere-2023-1925), 2023-09-01
Supplement: Supplementary file 1 [file egusphere-2023-1925-supplement.pdf]

# 1 Supplementary material

## 2 ERA5-Land analysis

3 Reanalysis data, including the variables 2m temperature, soil moisture layers 1-3, latent heat  
4 flux, LAI for high and low vegetation and downward solar radiation, from ERA5-Land from 1950  
5 – 2020 were used to validate the CMIP6-based results<sup>1,2</sup>. All data has been aggregated to the  
6 monthly time scale and  $2^{\circ} \times 2^{\circ}$  spatial resolution. Maximum daily temperature was computed as  
7 the maximum average daily temperature per month. The root-zone soil moisture encompasses  
8 the soil moisture in top meter of the soil and is computed as a weighted average of soil moisture  
9 layers 1 (0 – 7cm), 2 (7 – 28cm) and 3 (28 – 100cm). The same methodology as has been  
10 applied to the CMIP6 data to compute temperature excess and ELI has been applied to the  
11 reanalysis data. Vegetated conditions were assumed when the LAI of either high or low  
12 vegetation > 0.5.

13

## 14 Supplementary Figures

Sum of models for which  $\text{cor}(T_a', ET') > \text{cor}(SW_{in}', ET')$

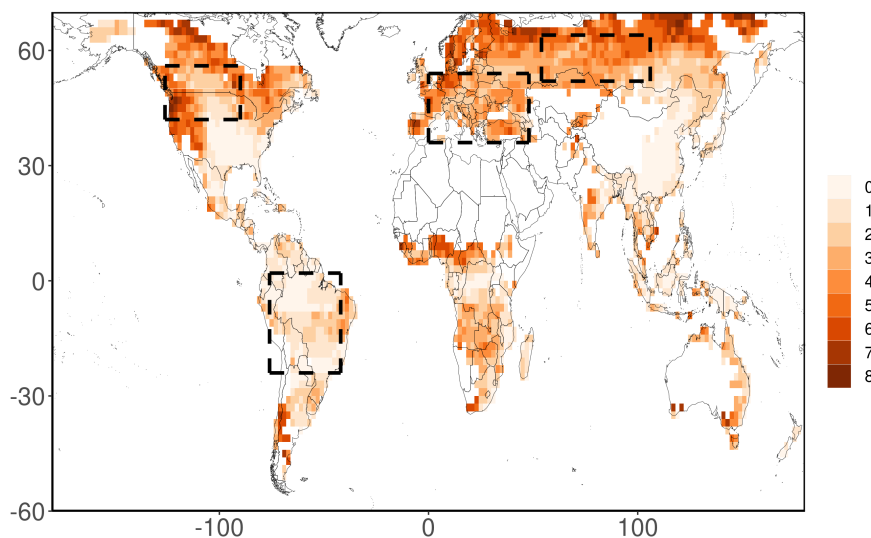

15

16

17 **Supplementary Figure 1: Spatial distribution of the sum of models that are temperature-**  
18 **controlled.** Colors show the sum of models for which  $\text{cor}(T_a', ET') > \text{cor}(SW_{in}', ET')$  over 1980  
19 – 2100.

20

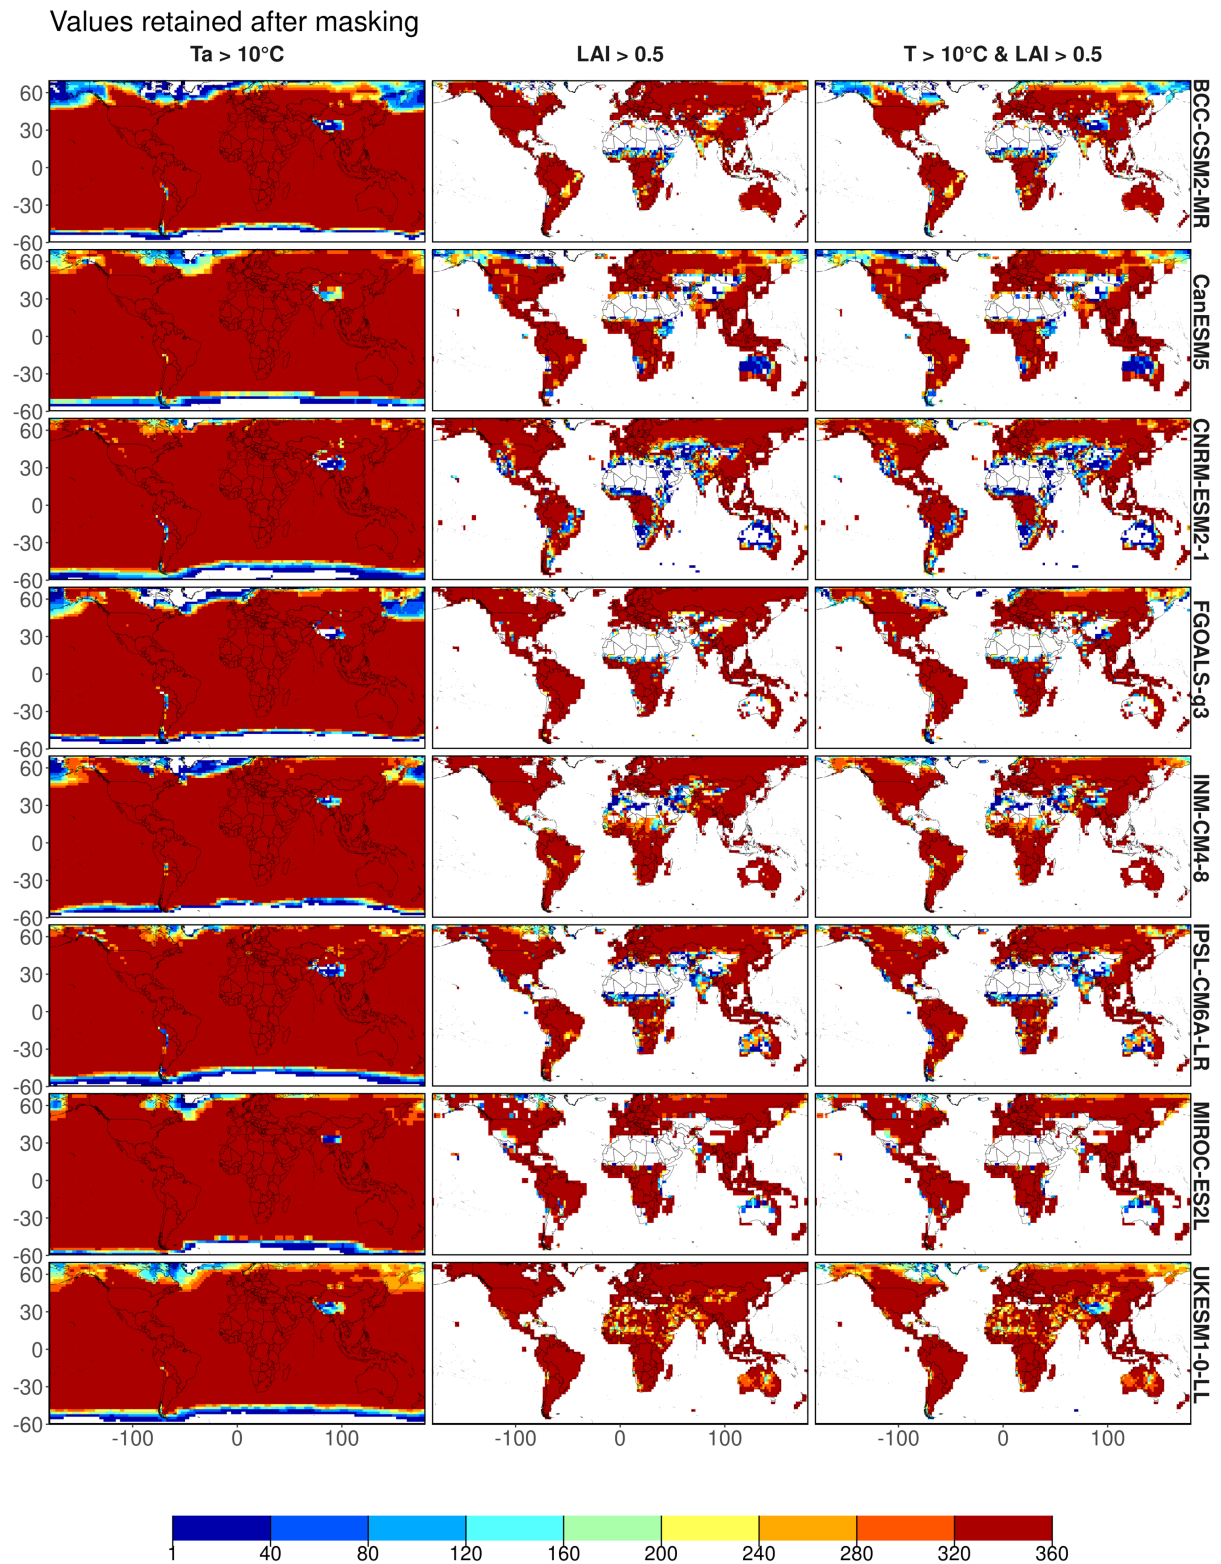

21  
 22 **Supplementary Figure 2: Data points retained after masking.** Columns denote the  
 23 applied filtering procedures (from left to right: Ta < 10°C, LAI < 0.5 and Ta < 10°C & LAI < 0.5).  
 24 Rows reflect the different individual models. The colors show the amount of values retained  
 25 after filtering, where the maximum amount of values possible equals 3 hottest months per  
 26 year over 120 years (360 data points). No data is available in the white regions.

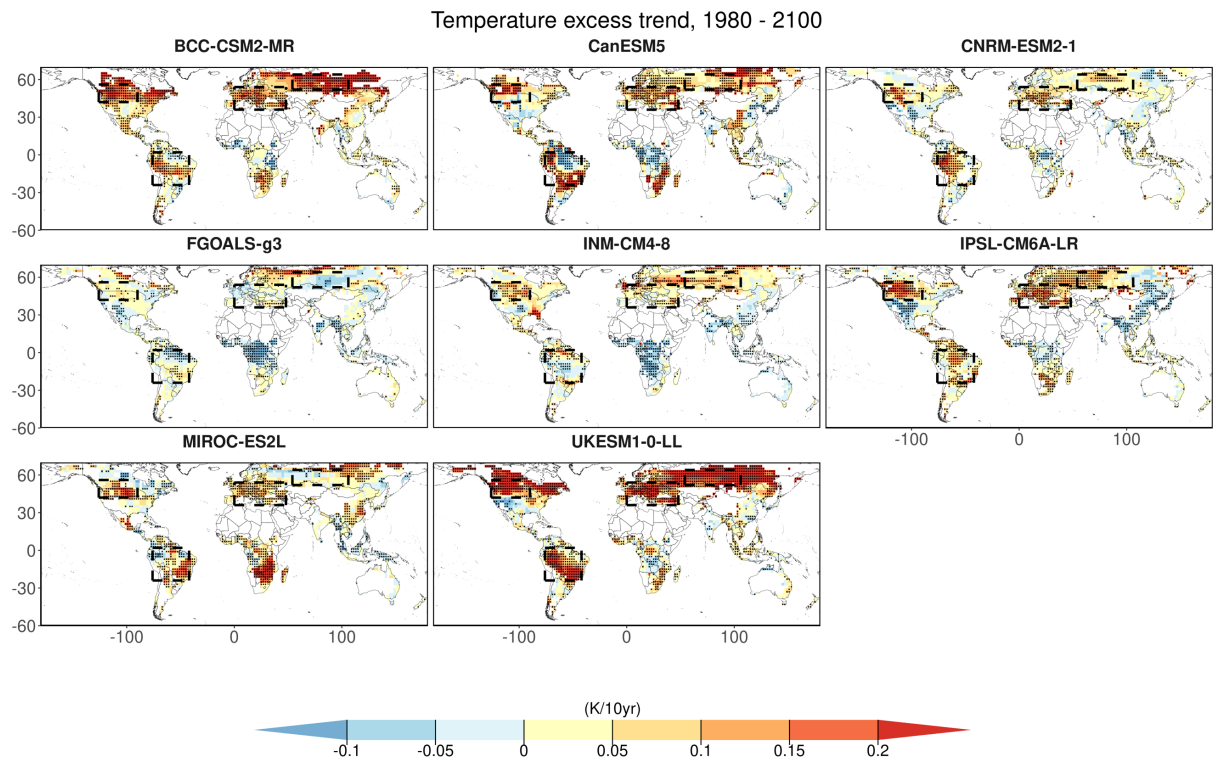

27

28 **Supplementary Figure 3: Trends of temperature excess for individual CMIP6 models.**

29 The model-specific trends across decadal temperature excess time series (dots indicate  
 30 significance:  $p < 0.05$  based on Kendall's tau statistic).

31

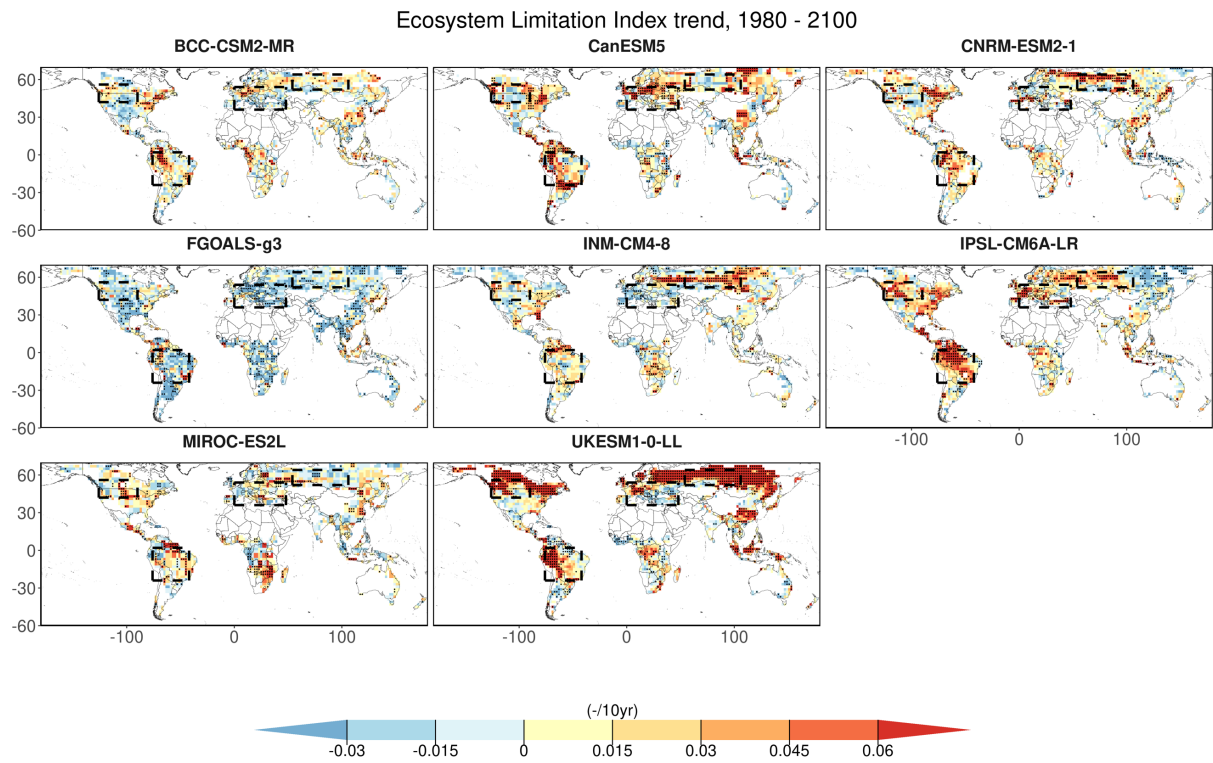

32

33 **Supplementary Figure 4: Trends in ecosystem water limitation for individual CMIP6**  
 34 **models.** The models-specific trends across decadal ELI time series (dots indicate significance:  
 35  $p < 0.05$  based on Kendall's tau statistic).

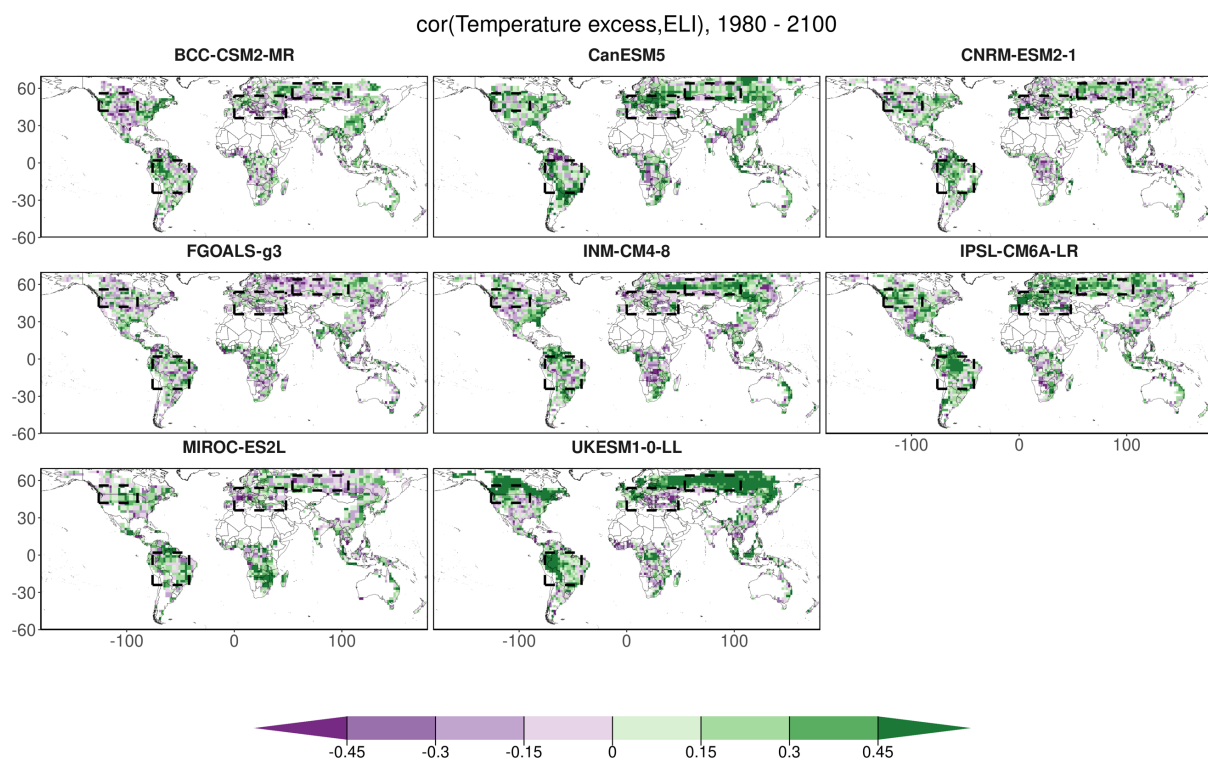

38 **Supplementary Figure 5: Kendall's rank correlation coefficient between ecosystem**  
39 **water limitation and temperature excess per individual CMIP6 model.**

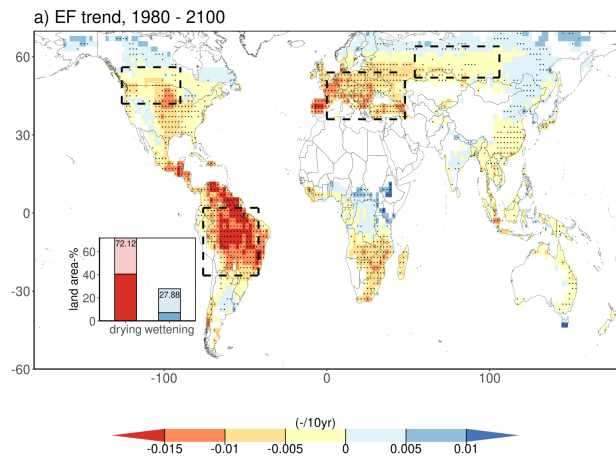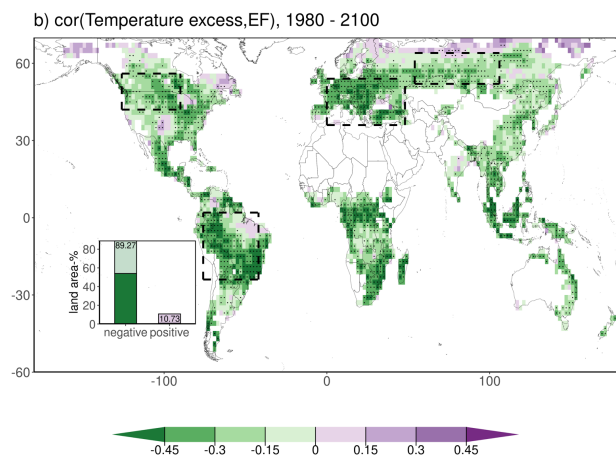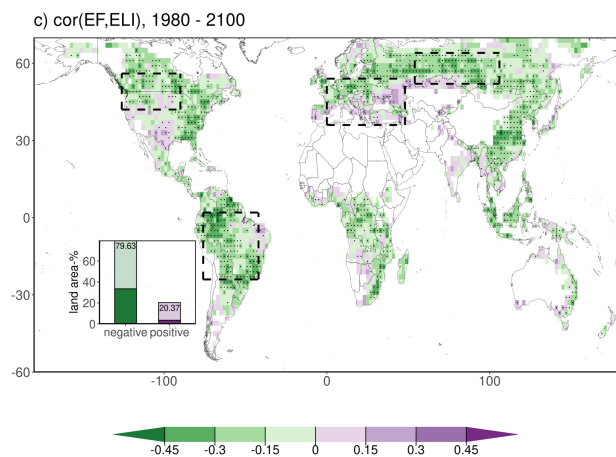

41

42 **Supplementary Figure 6: Global multi-model mean distribution and trends of**

43 **Evaporative Fraction (EF).** Multi-model mean of trends based on decadal time series per

44 respective CMIP6 model of a) EF and b) Ecosystem Limitation Index (ELI). c) Multi-model

45 mean of Kendall's rank correlation coefficient between model-specific time series of ELI and

46 temperature excess . The insets display the fraction of the warm land area that with positive or

47 negative trends or correlations, respectively (at least 6 out of 8 models agreeing on the sign of

48 the trend or correlation are hued darker). Stippling indicates that at least 6 out of 8 CMIP6  
 49 models agree on the sign of the trend or correlation. All trends and correlations are calculated  
 50 over the three hottest months-of-year, defined as the 3 months-of-year which have the highest  
 51 average temperature over 1980 - 2100. The dashed boxes indicate regions of interest.  
 52

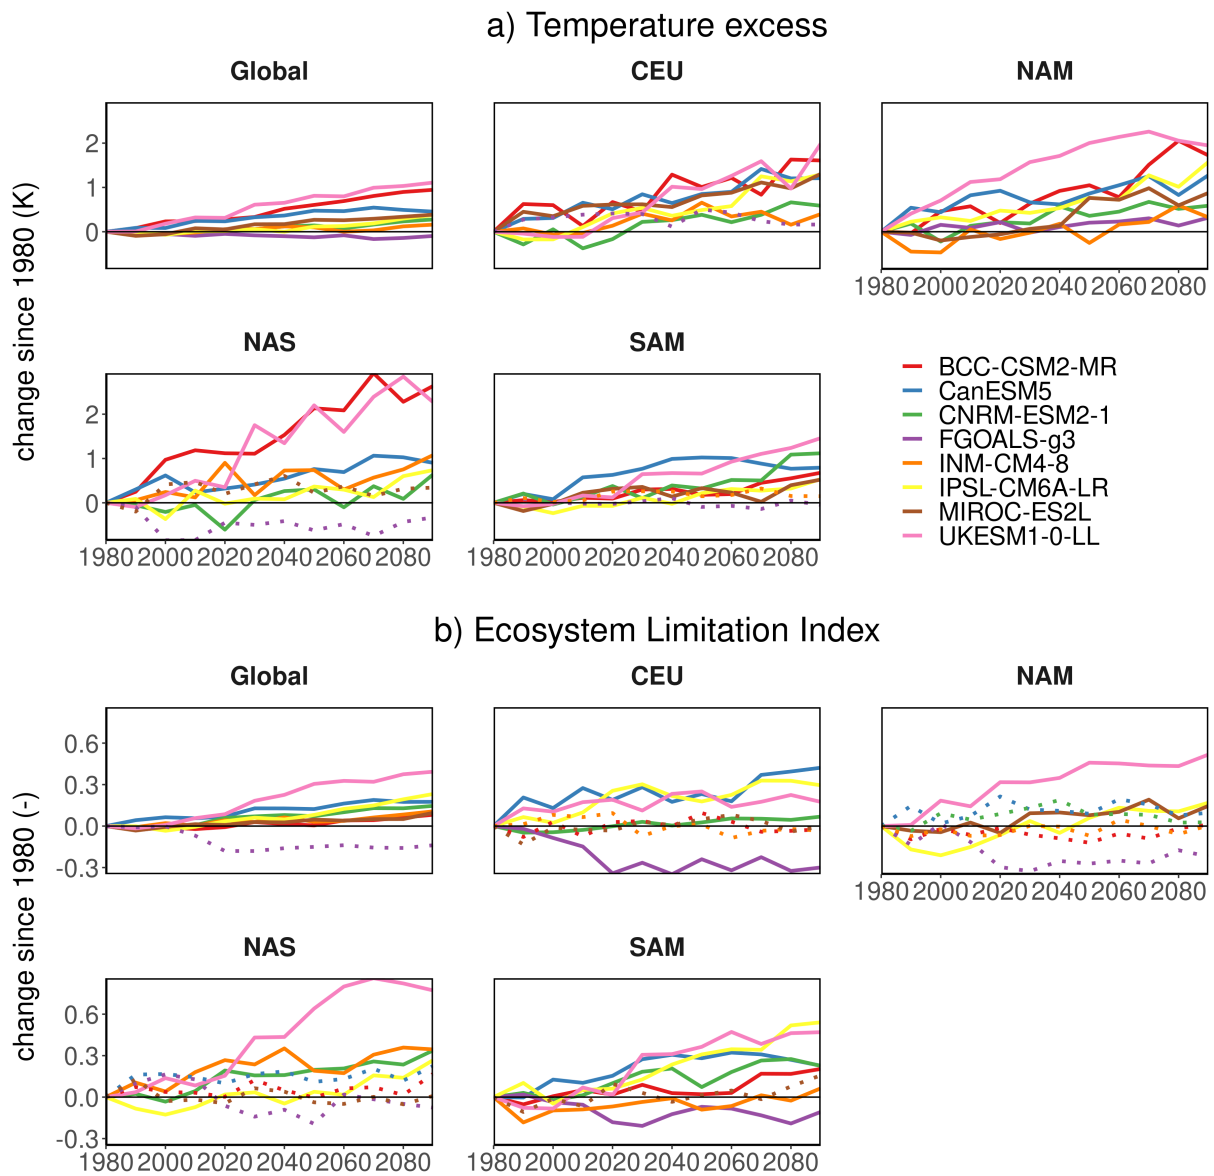

53  
 54 **Supplementary Figure 7: Model-specific changes in global and regional temperature**  
 55 **excess in line with increasing ecosystem water limitation.** Temporal evolution of a)  
 56 temperature excess and of b) Ecosystem Limitation Index (ELI) globally and for the regions of  
 57 interest. Solid lines depict global and regional time series with significant trends ( $p < 0.05$

58 based on Kendall's tau statistic). Global averages are calculated over land grid cells that have  
 59 complete time series for all models and variables and are weighted according to the surface  
 60 area per grid cell.  
 61

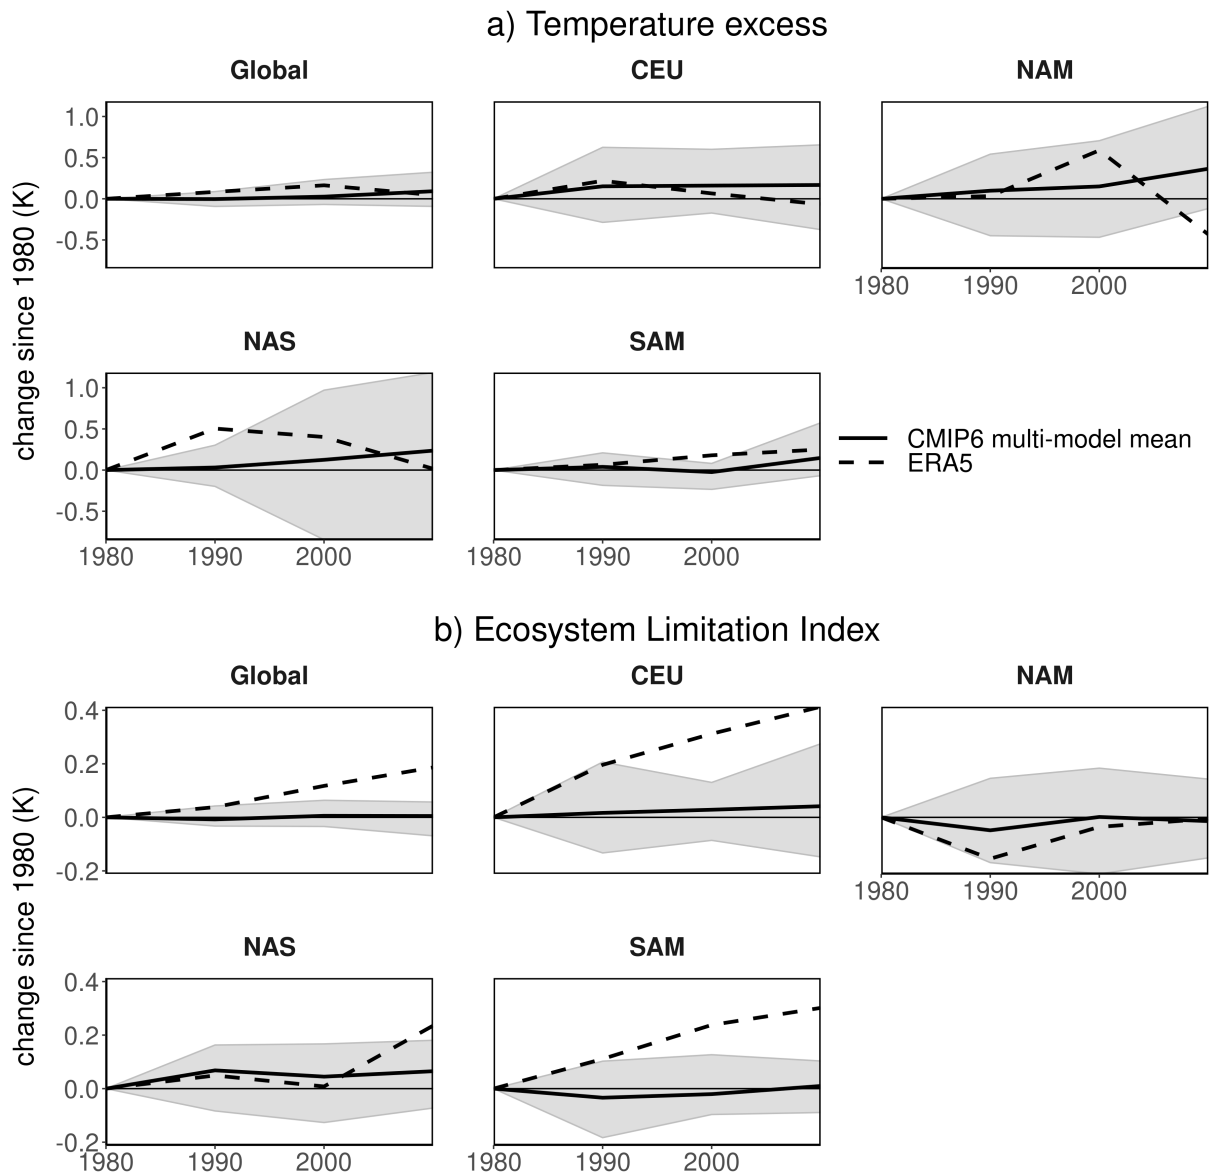

62  
 63 **Supplementary Figure 8: Changes in global and regional temperature excess in concert**  
 64 **with increasing ecosystem water limitation from CMIP6 models and ERA5-Land.**  
 65 Temporal evolution of a) temperature excess and of b) Ecosystem Limitation Index (ELI)  
 66 globally and for the regions of interest. The black solid lines depict global and regional time  
 67 from the CMIP6 models, while the black dashed line represent ERA5-Land. The grey ribbon



68 displays the envelope which encapsulates all the CMIP6 results. Global averages are  
69 calculated over land grid cells that have complete time series for all models and variables and  
70 are weighted according to the surface area per grid cell. The same mask is applied for CMIP6  
71 models and ERA5-Land.  
72

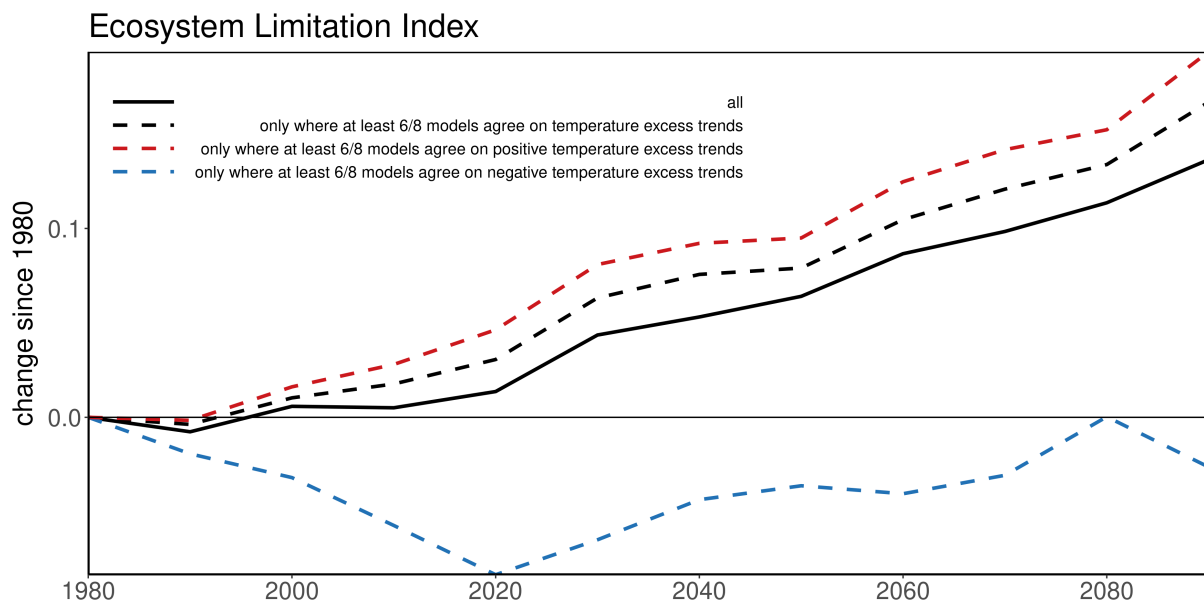

73  
74 **Supplementary Figure 9: Contrasting trends of ecosystem water limitation from areas**  
75 **with different robustness of temperature excess.** All lines depict multi-model mean time  
76 series inferred from the model-specific time series. The solid black line is the same as in Figure  
77 2b. The colored dashed lines only consider grid cells where at least 6 out of 8 CMIP6 models  
78 agree on temperature excess trends of either sign (black), positive (red) or negative (blue).  
79

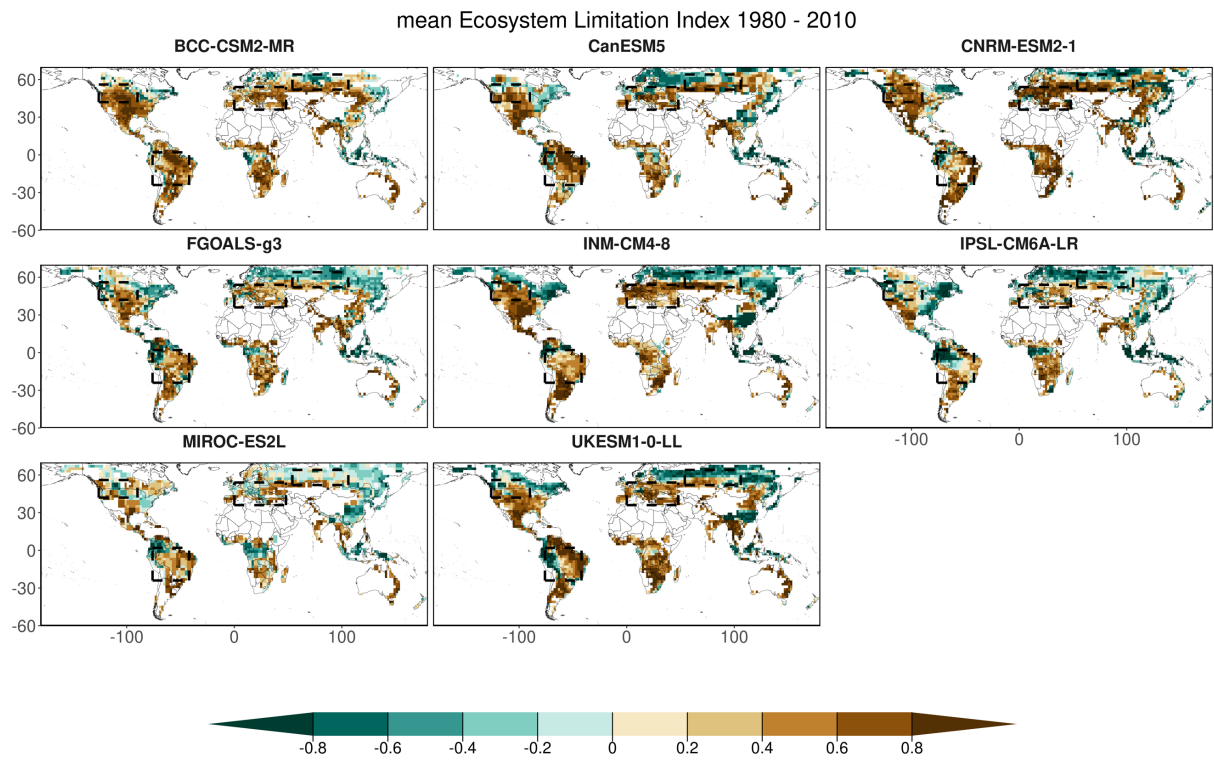

80

81 **Supplementary Figure 10: Model-specific initial ecosystem water limitation.** Model-  
 82 specific initial ELI averaged across 1980 - 2010.

83

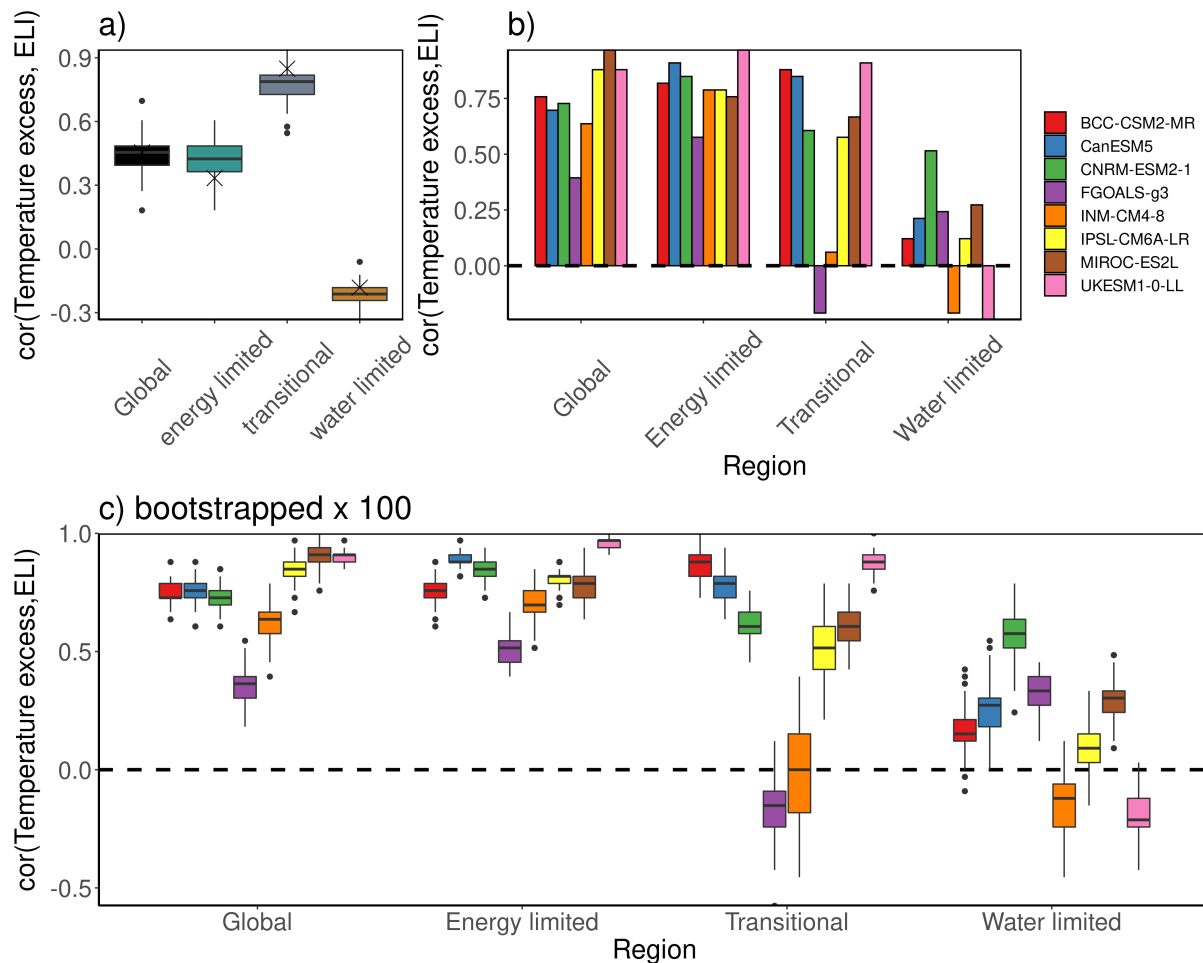

84

85 **Supplementary Figure 11: Model-specific global and regional correlations between**

86 **temperature excess and ecosystem water limitation.** a) Correlations between decadal

87 multi-model and regionally averaged time series of temperature excess and ELI, where

88 crosses denote the correlation based on the original data and the box plots denote the

89 uncertainty as obtained from bootstrapping (Methods). b) Barplots of correlations between

90 decadal regionally averaged time series of temperature excess and ELI. c) The same as panel

91 b), but with a hundred estimates obtained from bootstrapping. The regions are defined based

92 on the mean ELI (1980 - 2010; Supplementary Figure 9): Energy limited ( $ELI < -0.2$ ),

93 transitional ( $-0.2 < ELI < 0.2$ ) and water limited ( $ELI > 0.2$ ).

94

## 95 **References**

96 1. Muñoz Sabater, J. ERA5-Land monthly averaged data from 2001 to present. (2019)

97 doi:10.24381/CDS.68D2BB30.

98 2. Muñoz-Sabater, J. *et al.* ERA5-Land: a state-of-the-art global reanalysis dataset for land  
99 applications. *Earth System Science Data* **13**, 4349–4383 (2021).  
100
